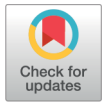

# Could Overt Diabetes Be Triggered by Abuse of Selective Androgen Receptor Modulators and Growth Hormone Secretagogues? A Case Report and Review of the Literature

Richard Sotorník,<sup>1,2</sup> Roguel Suissa,<sup>1</sup> and Jean-Luc Ardilouze<sup>3</sup>

## Case Presentation

In October 2018, a 47-year-old male recreational bodybuilder presented to his general practitioner in Prague, Czech Republic, with polydipsia (daily fluid intake 5–6 L), polyuria, blurred vision, malaise, and weight loss of 10 kg in the past month. He did not complain of any pain or fever and was taking no regular medication except recent (3 months) use of performance-enhancing drugs (PEDs) purchased from a fitness center, including two selective androgen receptor modulators (SARMs)—RAD140 5 mg twice daily and andarine 25 mg twice daily, 5 days per week—as well as the growth hormone (GH) secretagogue (GHS)/ghrelin analog ibutamoren 25 mg daily, 5 days per week. He had no previous use of hormonal supplements.

The patient reported no serious disease apart from borreliosis in 2012, seasonal pollinosis, and minor injuries related to physical activities. Three years before this visit, he underwent a routine general check-up. At that time, his weight was 109 kg, height was 180 cm, and calculated BMI was 33.6 kg/m<sup>2</sup>. Laboratory tests revealed impaired fasting glucose (IFG), although the

patient was not sure if he was fasting before sampling, as well as hepatopathy (elevated aminotransferases and liver steatosis on abdominal ultrasound scan), hyperuricemia, and dyslipidemia (Table 1). Regarding his family medical history, both parents were obese, his mother was diagnosed with diabetes at the age of 50 years (treated with oral hypoglycemic agents), and there was no available information about his grandparents. The patient had no siblings, and his only daughter was healthy.

Upon examination, he was fully coherent, alert, and oriented and displayed no signs of hyperventilation or dehydration. His physical appearance suggested intensive physical activity. His capillary blood glucose (Accu-Chek; Roche, Basel, Switzerland) was 558 mg/dL (31 mmol/L), weight was 102.7 kg, and BMI 31.7 kg/m<sup>2</sup>. His blood pressure was 150/100 mmHg.

Initial blood work (Table 1) confirmed hyperglycemia, high A1C, and dyslipidemia. Urinalysis showed high glucose and no ketones. Thyroid function was normal. Subsequent tests showed no GAD or insulinoma-associated protein 2 (IA-2) antibodies.

The patient was immediately referred to a diabetes care unit, where insulin therapy was initiated. He refused hospitalization but accepted intensive insulin therapy (glulisine and glargine) and cessation of PEDs. He was given a glucose meter and was instructed on blood glucose monitoring, diet, and insulin management. His clinical status, glucose profile, adherence to the diet, and insulin self-adjustment according to carbohydrate intake protocols were reviewed the next day and then at 1- to 4-week intervals.

During the first week, his glycemic profile improved (Table 2). His body composition (Tanita body composition analyzer; Tanita Corporation, Arlington Heights, IL) was as follows: weight 104.8 kg, lean body mass (LBM) 79.4 kg (75.8%), and total fat 21.4 kg (20.4%) (Table 3).

At week 2, the patient underwent laboratory work after omitting glargine the night before sampling. His fasting plasma glucose was 150 mg/dL (8.3 mmol/L), with values for insulin (11.3 mU/L, normal range 3.0–25.0)

<sup>1</sup>Canadian Medical, Prague, Czech Republic; <sup>2</sup>Third Faculty of Medicine, Charles University, Prague, Czech Republic; <sup>3</sup>Division of Endocrinology, University Hospital Center, Sherbrooke, Canada

Corresponding author: Richard Sotorník, richard.sotornik@lf3.cuni.cz  
<https://doi.org/10.2337/cd21-0044>

©2022 by the American Diabetes Association. Readers may use this article as long as the work is properly cited, the use is educational and not for profit, and the work is not altered. More information is available at <https://www.diabetesjournals.org/journals/pages/license>.

**TABLE 1** Historical, Initial, and Follow-Up Biochemistry

|                                          | Previous Results* | Initial Values† | 6 Weeks‡ | 12 Months‡ | Reference Range |
|------------------------------------------|-------------------|-----------------|----------|------------|-----------------|
| Glucose, mg/dL                           | 103               | 571             | 126      | 113        | 70–99           |
| A1C, %                                   | —                 | 13.9            | 8.6      | 5.6        | 4.0–6.0         |
| Total cholesterol, mg/dL                 | 201               | 259             | 193      | 205        | 112–193         |
| LDL cholesterol, mg/dL                   | 109               | 188             | 136      | 121        | 46–116          |
| HDL cholesterol, mg/dL                   | 36                | 31              | 39       | 47         | 39–81           |
| Triglycerides, mg/dL                     | 278               | 587             | 263      | 186        | 40–150          |
| Uric acid, mg/dL                         | 7.3               | 4.6             | 6.1      | —          | 3.4–7.0         |
| Creatinine, mg/dL                        | 1.16              | 1.22            | 1.06     | —          | 0.70–1.20       |
| eGFR-CKD-EPI, mL/min/1.73 m <sup>2</sup> | 74                | 70              | 83       | —          | 60–180          |
| CRP, mg/L                                | 0.4               | 0.6             | —        | —          | 0.0–5.0         |
| Bilirubin, mg/dL                         | 0.6               | —               | 0.4      | 0.4        | 0.0–1.2         |
| ALT, units/L                             | 65                | —               | 60       | 55         | 6–40            |
| AST, units/L                             | 45                | —               | 27       | 34         | 6–40            |
| ALP, units/L                             | 84                | —               | 88       | 78         | 40–131          |
| GGT, units/L                             | 34                | —               | 56       | 48         | 10–70           |
| Pancreatic amylase, units/L              | —                 | —               | 71       | 39         | 17–66           |
| Lipase, units/L                          | —                 | —               | 72       | 54         | 0–60            |
| TSH, mU/L                                | 1.70              | 2.11            | —        | —          | 0.27–4.20       |
| Free thyroxine, ng/dL                    | 1.3               | 1.2             | —        | —          | 0.9–1.7         |
| LH, IU/L                                 | —                 | —               | 3.1      | 2.3        | 1.6–9.0         |
| FSH, IU/L                                | —                 | —               | 2.4      | 3.7        | 1.4–15.1        |
| Total TST, ng/dL                         | —                 | —               | 160      | 286        | 209–800         |
| Free TST, %                              | —                 | —               | 46.4     | —          | 35.0–92.6       |
| Free TST, ng/mL                          | —                 | —               | —        | 0.94       | 0.83–2.06       |
| Estradiol, pg/mL                         | —                 | —               | 10.7     | 20.2       | 11.2–40.2       |
| SHBG, µg/dL                              | —                 | —               | 0.33     | 0.43       | 0.41–1.77       |

\*From general practitioner check-up 3 years before hyperglycemia manifestation. †Values at initial presentation. ‡Values after quitting PEDs and under antidiabetic treatment. ALP, alkaline phosphatase; CRP, C-reactive protein; eGFR-CKD-EPI, estimated glomerular filtration rate using the Chronic Kidney Disease Epidemiology Collaboration formula; FSH, follicle-stimulating hormone; GGT,  $\gamma$ -glutamyltransferase; LH, luteinizing hormone; TSH, thyroid-stimulating hormone; TST, testosterone.

and C-peptide (2.1 ng/mL, normal range 0.8–3.7) within the reference limits. The corresponding homeostatic model assessment for insulin resistance (HOMA-IR) value was 4.18.

At week 3, his glycemic profile further improved (Table 2), and he was able to discontinue glulisine. Metformin 500 mg twice daily was introduced in combination with glargine.

**TABLE 2** Blood Glucose Monitoring Data (mg/dL) with Intensive Insulin Therapy During the First 3 Weeks After PED Cessation

| Day | Breakfast |               | Lunch  |               | Dinner |               |
|-----|-----------|---------------|--------|---------------|--------|---------------|
|     | Before    | 2 Hours After | Before | 2 Hours After | Before | 2 Hours After |
| 1   | 283       | 409           | 321    | 324           | 285    | 288           |
| 6   | 211       | 169           | 115    | 148           | 135    | 178           |
| 21  | 139       | 103           | 106    | 144           | 128    | 97            |

Patient was asked to quit PEDs at presentation and did not report taking any PEDs thereafter. Intensive insulin therapy included glulisine and glargine.

At week 6, the patient's metabolic status showed continued improvement (Table 1), but pancreatic and hepatic irritation was found. An abdominal ultrasound showed persistent diffuse hepatic steatosis and a normal pancreas. Sex hormone testing revealed low sex hormone-binding globulin (SHBG), total testosterone, and estradiol but normal values of free testosterone and gonadotropins. Ophthalmology exam excluded diabetic retinopathy.

At week 10, his weight was 108.1 kg, LBM was 79.8 kg (73.8%), and fat mass was 24.2 kg (22.4%) (Table 3). Fasting blood glucose (FBG) was consistently <124 mg/dL (6.8 mmol/L) on only 8 units of glargine. Subsequently, glargine was ceased, and the patient continued treatment only with metformin 500 mg twice daily.

Meanwhile, the patient progressively resumed his regular, high-volume physical activity combining resistance training (1.25 hours daily in his fitness center) with endurance activities such as 3-hour volleyball matches, running 6–7 km, cycling 40 km, or in-line skating 25 km

several times per week. He gradually regained 5 kg and his self-estimated former level of physical performance.

During the next 10 months, his FBG remained between 108 and 126 mg/dL (6.0–7.0 mmol/L).

One year after presentation, IFG, dyslipidemia, and mild hepatopathy persisted. His HOMA-IR improved (3.60), and his A1C, pancreatic enzymes, and sex hormones reached normal limits (Table 1).

## Questions

1. Was the sudden deterioration of glucose control in this case a consequence of PED abuse?
2. If so, what mechanisms may have been involved?

## Commentary

### Overview of SARMs and GHS/Ghrelin Analogs

PEDs are compounds that are illicitly used to increase muscle mass and strength and reduce fat mass. The first representatives were testosterone and its derivatives (anabolic steroids) (1). Subsequently, the range has expanded to new classes, including SARMs and GHSs, which were shown to have some promising effects (in humans and/or animals) during pharmaceutical development. Originally, testosterone and anabolic steroids were secretly abused by elite athletes, but their use gradually spread to the general population (1,2). Currently, some PEDs can be easily procured as veterinary products (e.g., trenbolone acetate) in the United States and many other countries (3), but supplies are obtained mainly from illicit sources through dealers, in fitness centers, and via the internet (1,4–6). Although many PEDs are or include hormones, they are aggressively marketed as dietary supplements (7). As a result, they circumvent rigorous studies required for approval by the U.S. Food and Drug Administration (FDA) (1,2).

**TABLE 3** Changes in Body Composition from Week 1 to Week 10

|                        | Week 1 | Week 10 |
|------------------------|--------|---------|
| Height, cm             | 180    | —       |
| Weight, kg             | 104.8  | 108.1   |
| BMI, kg/m <sup>2</sup> | 32.3   | 33.4    |
| Lean body mass, kg     | 79.4   | 79.8    |
| Lean body mass, %      | 75.8   | 73.8    |
| Fat mass, kg           | 21.4   | 24.2    |
| Fat mass, %            | 20.4   | 22.4    |

Although the prevalence of androgenic steroid abuse is well documented (2,8), the extent to which other PEDs are used is largely unknown (1,7). A study assessing the situation in the United States in 2016 found that, of 44 products marketed and sold via the internet as SARMs, 52% contained one or more SARM, 39% contained another unapproved drug, 45% were sold as dietary supplements, and 55% were labeled “for research use only,” “not for human consumption,” or both (7).

To induce desired changes in body composition and performance, two major pathways are used: activation/modulation of androgen receptor activity and GH/insulin-like growth factor-1 (IGF-1) axis.

Testosterone represents the mainstay of the first approach because of its anabolic actions on muscles and the skeleton at the expense of its deleterious effects on the reproductive system. To attenuate these impacts, many anabolic steroids have been developed (1). The side effects of these drugs—polycythemia, hepatotoxicity, and debated cardiovascular effects—are other concerns (1,2,9), as well as deterioration of glucose metabolism associated with higher insulin resistance (IR) and visceral adipose tissue accumulation (10,11).

RAD140 and andarine are SARMs (i.e., nonsteroidal molecules) with affinity to androgen receptors as high as that of testosterone (12) and a larger dissociation between anabolic and androgenic properties than that of anabolic steroids. The molecular mechanism responsible for the tissue specificity of SARMs has not yet been clarified, but conformational changes in androgen receptor molecules distinct from those induced by testosterone binding, recruitment of different spectra of coactivators/corepressors (13), and resistance to metabolism have been proposed (1,14).

Preclinical studies have indicated anabolic properties of several SARMs (15), as well as some neuroprotective (16) or anticancer (14) effects. However, only a few SARMs have advanced to clinical testing in humans. Short-term studies tested three compounds—enobosarm (GTx-024, Memphis, TN), GSK2881078 (Glaxo-SmithKline, London, U.K.), and LGD-4033 (Ligand Pharmaceuticals, San Diego, CA)—with the results suggesting effects on muscle mass and some indices of muscle strength in healthy people or in patients with cancer (17–20). Side effects included decreased SHBG and total testosterone. All three SARMs decreased HDL cholesterol and triglyceride levels. An increase in LDL cholesterol was shown in a study of GSK2881078 (20). The impact on glucose metabolism was generally

neutral (21), although an enobosarm trial suggested some improvement in glucose control and IR (17).

The second approach is to activate the GH/IGF-1 axis. It is well established that GH promotes anabolism and increases LBM, stimulates lipolysis, and reduces fat mass (22). In excess, GH induces glucose intolerance and diabetes by reducing insulin sensitivity and glucose uptake in adipose tissue and muscle (23) and by increasing hepatic glucose production (22).

GH production and secretion can be stimulated by ligands acting through the GHS/ghrelin receptor. An endogenous ligand of the receptor is ghrelin (24,25). In addition to releasing GH, it regulates food intake and energy homeostasis and influences lipid metabolism and glucose homeostasis (26). Indeed, ghrelin directly and indirectly (by stimulation of somatostatin release from  $\delta$ -cells in the pancreas) inhibits insulin secretion and alters insulin sensitivity in animals and humans (26).

Several GHS/ghrelin receptor ligands such as ibutamoren have been synthesized. Ibutamoren is a nonpeptidic GHS with high oral bioavailability and a long half-life (4.7 hours) (27). It was tested for the treatment of childhood-onset GH deficiency in both children (28) and adults (29). Ibutamoren (5–50 mg daily) was also tested for anabolic indications in humans. Despite evidence of the resulting significant increases in GH, IGF-1, and LBM, studies did not provide compelling evidence of benefits in most functional measures (e.g., muscle strength and stair-climbing power) or effects on bone or total or visceral fat mass (30–33). However, a consistent adverse effect of ibutamoren was glucose tolerance deterioration demonstrated by FBG, 75-g oral glucose tolerance testing, meal challenge, A1C elevation, or decreased insulin sensitivity (29–31,33–35). In one study, the dose of ibutamoren was reduced from 25 to 10 mg daily as FBG increased to  $>140$  mg/dL in five patients (6%) and was discontinued in three because of ongoing hyperglycemia (34).

To date, given the limited data on the effectiveness and safety of these products, the FDA has approved no SARMs or GHSs for clinical use (7,27,30). Despite the FDA's position, SARMs and GHSs, including those lacking any human investigations or dose recommendations, are widely used in fitness centers (6). Both SARMs used by the patient in this case belong in this latter category. Only animal studies have shown their anabolic effects, with a decrease in fat mass (15,36,37). Moreover, andarine seems to decrease gonadotropins in

rats, while RAD140 lowers lipids (triglycerides and LDL and HDL cholesterol) in cynomolgous monkeys.

### *Could This Patient's Severe Hyperglycemia Have Been Related to His Use of PEDs?*

It must be highlighted that our patient had diabetogenic potential, which may have facilitated the metabolic crisis described herein. This potential for diabetes development was related to family history (both parents had obesity and his mother had type 2 diabetes), and a health check-up 3 years earlier showed metabolic syndrome (class I obesity, IFG, mixed dyslipidemia, hyperuricemia, and liver steatosis).

In the year after our patient ceased taking PEDs, his glucose values decreased to IFG levels, and his A1C normalized. His diet improved and he resumed high-volume physical activity, and only minor hypoglycemic therapy was used. His HOMA-IR decreased slightly from 4.18 to 3.6, a value that is above the proposed limit of 2.0 for healthy people without liver steatosis (38). Likewise, his dyslipidemia and hepatopathy did not resolve completely within this year.

An important key in this case is the IR condition, predominantly hepatic, as suggested by IFG, nonalcoholic fatty liver disease (NAFLD), mixed dyslipidemia, and HOMA-IR values. Individuals with NAFLD also show significant adipose tissue and muscle IR and are at high risk of type 2 diabetes (39). Adipose and muscle IR were not tested because of our clinical practice setting. We think that this patient was probably able to counterbalance this unfavorable metabolic condition for years with his intense physical activity program, which had a positive effect on insulin sensitivity, especially in his muscles (40).

Despite this dysmetabolic status, we believe that the hyperglycemic crisis was triggered by the addition of PEDs. The time between starting PEDs and diabetes manifestation (a 2- to 3-month delay) and the short time required to recover his initial status after quitting PEDs strongly suggest a causal relationship. This explanation is in line with one article reporting that hyperglycemia developed after 3.5 months of bovine GH and anabolic steroid abuse (3). To the best of our knowledge, no case of SARM- and GHS-induced diabetes has been reported yet.

Some indirect and putative explanations can be proposed for this clinical picture. The most important player seems to be ibutamoren. The dosing of ibutamoren in our patient corresponds to that used in clinical

trials. As described above, ibutamoren may induce hyperglycemia and IR through a putative increase in GH with a direct effect on gluconeogenesis and insulin signaling (22). Ibutamoren could also directly alter insulin secretion through GHS/ghrelin receptors localized in the pancreas (41), as does ghrelin (42). Therefore, we tend to relate hyperglycemia to ibutamoren, as SARMs seem to be glucose neutral (17,21).

Another putative and more complex mechanism seems to be increased lipolysis. Some evidence led us to believe that ibutamoren and SARMs played a role. Although ibutamoren was not confirmed to induce loss of fat mass in clinical trials, it increases GH, which is well known for its lipolytic properties. Of note, for certain SARMs (enobosarm), lipolytic and antilipogenic effects were described in vitro, similar to the effects of testosterone (43), together with a reducing effect on fat mass in rats (andarine) and humans (enobosarm) (17,37).

Thus, we hypothesize that the additive effect of all three PEDs led to lipolysis with the following harmful metabolic effects: 1) high levels of free fatty acids (FFAs) decreased glucose utilization because FFAs compete with glucose as an energy substrate for oxidation in muscle (22), stimulate gluconeogenesis in the liver, and have lipotoxic effects on  $\beta$ -cells (23) and 2) increased lipolysis, together with IR and relative insulin deficiency, could have participated in accelerated triglyceride synthesis by the liver and led to very high triglyceride levels (44). We can indirectly infer that major lipolysis had taken place based on changes in body weight and composition. General catabolism and dehydration could partly explain the initial weight loss, whereas after care and discontinuation of PEDs, fat mass increased (2.8 vs. only 0.3 kg of LBM) from week 1 to week 10. This rebound, despite following a healthful diet and resuming intense physical activity, suggests high fat mass catabolism during PED use.

Finally, as a result of all of these processes, rising glucose levels might have further hampered insulin secretion (45) and sensitivity (46) via direct glucotoxic effects. Therefore, a vicious cycle of severe IR and altered insulin secretion developed. This cycle was interrupted by therapeutic intervention. The patient returned to his former metabolic setting corresponding to a metabolic syndrome.

### *Other Laboratory Findings*

In accordance with previous reports (17,21), our data suggest a suppressive effect of SARMs on hepatic SHBG



## CASE STUDY

production, resulting in low total testosterone and estradiol levels, although free testosterone and gonadotropins remained normal. After discontinuing the use of PEDs, SHBG, total testosterone, and estradiol returned to normal values.

## Clinical Pearls

- Among recreational athletes, many PEDs are used despite the lack of clinical and safety data.
- PEDs are often used in combinations, which may potentiate their side effects.
- Clinicians should be aware of adverse events and possible health consequences of PED use. Our case suggests another adverse event: severe hyperglycemia with dyslipidemia without ketosis.

## ACKNOWLEDGMENTS

The authors thank Keely Fraser, First Faculty of Medicine, Charles University, Prague, Czech Republic, who helped to edit the manuscript.

## DUALITY OF INTEREST

No potential conflicts of interest relevant to this article were reported.

## AUTHOR CONTRIBUTIONS

R.So. collected data, wrote the manuscript, contributed to discussion, and reviewed/edited the manuscript.  
R.Su. researched data and reviewed/edited the manuscript.  
J.-L.A. contributed to discussion and reviewed/edited the manuscript. R.So. is the guarantor of this work and, as such, had full access to all the data in the case presentation and literature review and takes responsibility for the integrity of the information presented.

## REFERENCES

1. Pope HG Jr, Wood RI, Rogol A, Nyberg F, Bowers L, Bhasin S. Adverse health consequences of performance-enhancing drugs: an Endocrine Society scientific statement. *Endocr Rev* 2014;35:341–375
2. Auchus RJ, Brower KJ. The public health consequences of performance-enhancing substances: who bears responsibility? *JAMA* 2017;318:1983–1984
3. Geraci MJ, Cole M, Davis P. New onset diabetes associated with bovine growth hormone and testosterone abuse in a young body builder. *Hum Exp Toxicol* 2011;30:2007–2012
4. Handelsman DJ. Androgen misuse and abuse. *Endocr Rev* 2021;42:457–501
5. Barbara M, Dhingra S, Mindikoglu AL. Drug-induced liver injury associated with Alpha Bolic (RAD-140) and Alpha Elite (RAD-140 and LGD-4033). *ACG Case Rep J* 2020;7:e00409
6. Machek SB, Cardaci TD, Wilburn DT, Willoughby DS. Considerations, possible contraindications, and potential

mechanisms for deleterious effect in recreational and athletic use of selective androgen receptor modulators (SARMs) in lieu of anabolic androgenic steroids: a narrative review. *Steroids* 2020;164:108753

7. Van Wagoner RM, Eichner A, Bhasin S, Deuster PA, Eichner D. Chemical composition and labeling of substances marketed as selective androgen receptor modulators and sold via the internet. *JAMA* 2017;318:2004–2010
8. Sagoe D, Molde H, Andreassen CS, Torsheim T, Pallesen S. The global epidemiology of anabolic-androgenic steroid use: a meta-analysis and meta-regression analysis. *Ann Epidemiol* 2014;24:383–398
9. van Amsterdam J, Opperhuizen A, Hartgens F. Adverse health effects of anabolic-androgenic steroids. *Regul Toxicol Pharmacol* 2010;57:117–123
10. Rasmussen JJ, Schou M, Selmer C, et al. Insulin sensitivity in relation to fat distribution and plasma adipocytokines among abusers of anabolic androgenic steroids. *Clin Endocrinol (Oxf)* 2017;87:249–256
11. Cohen JC, Hickman R. Insulin resistance and diminished glucose tolerance in powerlifters ingesting anabolic steroids. *J Clin Endocrinol Metab* 1987;64:960–963
12. Gao W, Kearbey JD, Nair VA, et al. Comparison of the pharmacological effects of a novel selective androgen receptor modulator, the 5 $\alpha$ -reductase inhibitor finasteride, and the antiandrogen hydroxyflutamide in intact rats: new approach for benign prostate hyperplasia. *Endocrinology* 2004;145:5420–5428
13. Furuya K, Yamamoto N, Ohyabu Y, et al. Mechanism of the tissue-specific action of the selective androgen receptor modulator S-101479. *Biol Pharm Bull* 2013;36:442–451
14. Christiansen AR, Lipshultz LI, Hotelling JM, Pastuszak AW. Selective androgen receptor modulators: the future of androgen therapy? *Transl Androl Urol* 2020;9(Suppl. 2):S135–S148
15. Gao W, Reiser PJ, Coss CC, et al. Selective androgen receptor modulator treatment improves muscle strength and body composition and prevents bone loss in orchidectomized rats. *Endocrinology* 2005;146:4887–4897
16. Jayaraman A, Christensen A, Moser VA, et al. Selective androgen receptor modulator RAD140 is neuroprotective in cultured neurons and kainate-lesioned male rats. *Endocrinology* 2014;155:1398–1406
17. Dalton JT, Barnette KG, Bohl CE, et al. The selective androgen receptor modulator GTx-024 (enobosarm) improves lean body mass and physical function in healthy elderly men and postmenopausal women: results of a double-blind, placebo-controlled phase II trial. *J Cachexia Sarcopenia Muscle* 2011;2:153–161
18. Dobs AS, Boccia RV, Croot CC, et al. Effects of enobosarm on muscle wasting and physical function in patients with cancer: a double-blind, randomised controlled phase 2 trial. *Lancet Oncol* 2013;14:335–345
19. Basaria S, Collins L, Dillon EL, et al. The safety, pharmacokinetics, and effects of LGD-4033, a novel nonsteroidal oral, selective androgen receptor modulator,

- in healthy young men. *J Gerontol A Biol Sci Med Sci* 2013; 68:87–95
20. Neil D, Clark RV, Magee M, et al. GSK2881078, a SARM, produces dose-dependent increases in lean mass in healthy older men and women. *J Clin Endocrinol Metab* 2018;103: 3215–3224
  21. Clark RV, Walker AC, Andrews S, Turnbull P, Wald JA, Magee MH. Safety, pharmacokinetics and pharmacological effects of the selective androgen receptor modulator, GSK2881078, in healthy men and postmenopausal women. *Br J Clin Pharmacol* 2017;83: 2179–2194
  22. Hannon AM, Thompson CJ, Sherlock M. Diabetes in patients with acromegaly. *Curr Diab Rep* 2017;17:8
  23. Ferraù F, Albani A, Ciresi A, Giordano C, Cannavò S. Diabetes secondary to acromegaly: physiopathology, clinical features and effects of treatment. *Front Endocrinol (Lausanne)* 2018;9:358
  24. Girgis CM, Mokbel N, Digirolamo DJ. Therapies for musculoskeletal disease: can we treat two birds with one stone? *Curr Osteoporos Rep* 2014;12:142–153
  25. Lv Y, Liang T, Wang G, Li Z. Ghrelin, a gastrointestinal hormone, regulates energy balance and lipid metabolism. *Biosci Rep* 2018;38:BSR20181061
  26. Mani BK, Shankar K, Zigman JM. Ghrelin's relationship to blood glucose. *Endocrinology* 2019;160:1247–1261
  27. Sigalos JT, Pastuszak AW. The safety and efficacy of growth hormone secretagogues. *Sex Med Rev* 2018;6:45–53
  28. Codner E, Cassorla F, Tiulpakov AN, et al. Effects of oral administration of ibutamoren mesylate, a nonpeptide growth hormone secretagogue, on the growth hormone-insulin-like growth factor I axis in growth hormone-deficient children. *Clin Pharmacol Ther* 2001;70:91–98
  29. Chapman IM, Pescovitz OH, Murphy G, et al. Oral administration of growth hormone (GH) releasing peptide-mimetic MK-677 stimulates the GH/insulin-like growth factor-I axis in selected GH-deficient adults. *J Clin Endocrinol Metab* 1997;82:3455–3463
  30. Adunsky A, Chandler J, Heyden N, et al. MK-0677 (ibutamoren mesylate) for the treatment of patients recovering from hip fracture: a multicenter, randomized, placebo-controlled phase IIb study. *Arch Gerontol Geriatr* 2011;53:183–189
  31. Nass R, Pezzoli SS, Oliveri MC, et al. Effects of an oral ghrelin mimetic on body composition and clinical outcomes in healthy older adults: a randomized trial. *Ann Intern Med* 2008;149:601–611
  32. Murphy MG, Weiss S, McClung M, et al.; MK-677/ Alendronate Study Group. Effect of alendronate and MK-677 (a growth hormone secretagogue), individually and in combination, on markers of bone turnover and bone mineral density in postmenopausal osteoporotic women. *J Clin Endocrinol Metab* 2001;86:1116–1125
  33. Svensson J, Lönn L, Jansson JO, et al. Two-month treatment of obese subjects with the oral growth hormone (GH) secretagogue MK-677 increases GH secretion, fat-free mass, and energy expenditure. *J Clin Endocrinol Metab* 1998;83:362–369
  34. Murphy MG, Bach MA, Plotkin D, et al. Oral administration of the growth hormone secretagogue MK-677 increases markers of bone turnover in healthy and functionally impaired elderly adults. The MK-677 Study Group. *J Bone Miner Res* 1999;14:1182–1188
  35. Sevigny JJ, Ryan JM, van Dyck CH, Peng Y, Lines CR; MK-677 Protocol 30 Study Group. Growth hormone secretagogue MK-677: no clinical effect on AD progression in a randomized trial. *Neurology* 2008;71:1702–1708
  36. Miller CP, Shomali M, Lyttle CR, et al. Design, synthesis, and preclinical characterization of the selective androgen receptor modulator [SARM] RAD140. *ACS Med Chem Lett* 2010;2:124–129
  37. Kearbey JD, Gao W, Narayanan R, et al. Selective androgen receptor modulator (SARM) treatment prevents bone loss and reduces body fat in ovariectomized rats. *Pharm Res* 2007;24:328–335
  38. Isokuortti E, Zhou Y, Peltonen M, et al. Use of HOMA-IR to diagnose non-alcoholic fatty liver disease: a population-based and inter-laboratory study. *Diabetologia* 2017;60: 1873–1882
  39. Brouwers B, Schrauwen-Hinderling VB, Jelenik T, et al. Metabolic disturbances of non-alcoholic fatty liver resemble the alterations typical for type 2 diabetes. *Clin Sci (Lond)* 2017;131:1905–1917
  40. Hansen D, De Strijcker D, Calders P. Impact of endurance exercise training in the fasted state on muscle biochemistry and metabolism in healthy subjects: can these effects be of particular clinical benefit to type 2 diabetes mellitus and insulin-resistant patients? *Sports Med* 2017;47:415–428
  41. Gnanapavan S, Kola B, Bustin SA, et al. The tissue distribution of the mRNA of ghrelin and subtypes of its receptor, GHS-R, in humans. *J Clin Endocrinol Metab* 2002;87:2988
  42. Dezaki K, Hosoda H, Kakei M, et al. Endogenous ghrelin in pancreatic islets restricts insulin release by attenuating  $Ca^{2+}$  signaling in beta-cells: implication in the glycemic control in rodents. *Diabetes* 2004;53:3142–3151
  43. Leciejewska N, Pruszyńska-Oszmolek E, Bien J, Nogowski L, Kołodziejewski PA. Effect of ostarine (enobosarm/ GTX024), a selective androgen receptor modulator, on adipocyte metabolism in Wistar rats. *J Physiol Pharmacol* 2019;70 [doi: 10.26402/jpp.2019.4.04]
  44. Adeli K, Taghibiglou C, Van Iderstine SC, Lewis GF. Mechanisms of hepatic very low-density lipoprotein overproduction in insulin resistance. *Trends Cardiovasc Med* 2001;11:170–176
  45. Poitout V, Robertson RP. Glucolipotoxicity: fuel excess and beta-cell dysfunction. *Endocr Rev* 2008;29:351–366
  46. Burén J, Lindmark S, Renström F, Eriksson JW. In vitro reversal of hyperglycemia normalizes insulin action in fat cells from type 2 diabetes patients: is cellular insulin resistance caused by glucotoxicity in vivo? *Metabolism* 2003;52:239–245
